# Supplementary material for: Anion-binding aromatic pentaamide macrocycles: Synthesis, high-affinity binding, transmembrane transport, and catalysis
Source: Research Square preprint supplement (doi:10.21203/rs.3.rs-1264431/v1), 2022-02-04

---

The following ALERTS were generated. Each ALERT has the format

**test-name\_ALERT\_alert-type\_alert-level.**

Click on the hyperlinks for more details of the test.

---

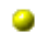

### Alert level C

DIFMN02\_ALERT\_2\_C The minimum difference density is  $< -0.1 \times Z_{MAX} \times 0.75$   
    \_refine\_diff\_density\_min given = -0.774  
    Test value = -0.600

DIFMN03\_ALERT\_1\_C The minimum difference density is  $< -0.1 \times Z_{MAX} \times 0.75$   
    The relevant atom site should be identified.

DIFMX02\_ALERT\_1\_C The maximum difference density is  $> 0.1 \times Z_{MAX} \times 0.75$   
    The relevant atom site should be identified.

PLAT097\_ALERT\_2\_C Large Reported Max. (Positive) Residual Density 0.79 eA-3

PLAT098\_ALERT\_2\_C Large Reported Min. (Negative) Residual Density -0.77 eA-3

PLAT213\_ALERT\_2\_C Atom C58 has ADP max/min Ratio ..... 3.2 prolat

PLAT220\_ALERT\_2\_C NonSolvent Resd 1 C Ueq(max)/Ueq(min) Range 5.1 Ratio

PLAT222\_ALERT\_3\_C NonSolvent Resd 1 H Uiso(max)/Uiso(min) Range 4.9 Ratio

PLAT230\_ALERT\_2\_C Hirshfeld Test Diff for C45 --C46 . 5.5 s.u.

PLAT230\_ALERT\_2\_C Hirshfeld Test Diff for C53 --C59 . 7.0 s.u.

PLAT242\_ALERT\_2\_C Low 'MainMol' Ueq as Compared to Neighbors of C53 Check

PLAT414\_ALERT\_2\_C Short Intra D-H..H-X H7 ..H50C . 1.98 Ang.  
    x,y,z = 1\_555 Check

PLAT414\_ALERT\_2\_C Short Intra D-H..H-X H8 ..H59C . 1.95 Ang.  
    x,y,z = 1\_555 Check

PLAT414\_ALERT\_2\_C Short Intra D-H..H-X H10 ..H74C . 1.99 Ang.  
    x,y,z = 1\_555 Check

PLAT420\_ALERT\_2\_C D-H Bond Without Acceptor N2 --H2 . Please Check

PLAT906\_ALERT\_3\_C Large K Value in the Analysis of Variance ..... 4.479 Check

PLAT911\_ALERT\_3\_C Missing FCF Refl Between Thmin & STh/L= 0.600 14 Report

PLAT918\_ALERT\_3\_C Reflection(s) with I(obs) much Smaller I(calc) . 1 Check

PLAT922\_ALERT\_1\_C wR2 in the CIF and FCF Differ by ..... 0.0021 Check

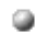

### Alert level G

PLAT002\_ALERT\_2\_G Number of Distance or Angle Restraints on AtSite 26 Note

PLAT003\_ALERT\_2\_G Number of Uiso or Uij Restrained non-H Atoms ... 31 Report

PLAT007\_ALERT\_5\_G Number of Unrefined Donor-H Atoms ..... 16 Report

PLAT042\_ALERT\_1\_G Calc. and Reported Moiety Formula Strings Differ Please Check

PLAT072\_ALERT\_2\_G SHELXL First Parameter in WGHT Unusually Large 0.14 Report

PLAT153\_ALERT\_1\_G The s.u.'s on the Cell Axes are Equal ..(Note) 0.0001 Ang.

PLAT154\_ALERT\_1\_G The s.u.'s on the Cell Angles are Equal ..(Note) 0.001 Degree

PLAT172\_ALERT\_4\_G The CIF-Embedded .res File Contains DFIX Records 9 Report

PLAT173\_ALERT\_4\_G The CIF-Embedded .res File Contains DANG Records 8 Report

PLAT175\_ALERT\_4\_G The CIF-Embedded .res File Contains SAME Records 1 Report

PLAT176\_ALERT\_4\_G The CIF-Embedded .res File Contains SADI Records 5 Report

PLAT178\_ALERT\_4\_G The CIF-Embedded .res File Contains SIMU Records 3 Report

PLAT186\_ALERT\_4\_G The CIF-Embedded .res File Contains ISOR Records 1 Report

PLAT187\_ALERT\_4\_G The CIF-Embedded .res File Contains RIGU Records 6 Report

PLAT301\_ALERT\_3\_G Main Residue Disorder .....(Resd 1 ) 14% Note

PLAT302\_ALERT\_4\_G Anion/Solvent/Minor-Residue Disorder (Resd 2 ) 100% Note

PLAT304\_ALERT\_4\_G Non-Integer Number of Atoms in ..... (Resd 1 ) 189.05 Check

PLAT304\_ALERT\_4\_G Non-Integer Number of Atoms in ..... (Resd 2 ) 0.95 Check

PLAT398\_ALERT\_2\_G Deviating C-O-C Angle From 120 for O13A . 99.9 Degree

PLAT411\_ALERT\_2\_G Short Inter H...H Contact H46B ..H48B . 1.81 Ang.  
    x,y,z = 1\_555 Check

|                                                                    |             |        |       |           |
|--------------------------------------------------------------------|-------------|--------|-------|-----------|
| PLAT411_ALERT_2_G Short Inter H...H Contact                        | H55A        | ..H47C | .     | 2.03 Ang. |
|                                                                    | 2-x,1-y,2-z | =      | 2_767 | Check     |
| PLAT411_ALERT_2_G Short Inter H...H Contact                        | H55A        | ..H47D | .     | 1.92 Ang. |
|                                                                    | 2-x,1-y,2-z | =      | 2_767 | Check     |
| PLAT411_ALERT_2_G Short Inter H...H Contact                        | H55B        | ..H47D | .     | 1.75 Ang. |
|                                                                    | 2-x,1-y,2-z | =      | 2_767 | Check     |
| PLAT411_ALERT_2_G Short Inter H...H Contact                        | H56         | ..H47D | .     | 2.06 Ang. |
|                                                                    | 2-x,1-y,2-z | =      | 2_767 | Check     |
| PLAT414_ALERT_2_G Short Intra D-H..H-X                             | H9          | ..H62B | .     | 2.00 Ang. |
|                                                                    | x,y,z       | =      | 1_555 | Check     |
| PLAT432_ALERT_2_G Short Inter X...Y Contact                        | O9          | ..C48B | .     | 2.34 Ang. |
|                                                                    | x,y,z       | =      | 1_555 | Check     |
| PLAT432_ALERT_2_G Short Inter X...Y Contact                        | C30         | ..C72A | .     | 3.00 Ang. |
|                                                                    | 1-x,2-y,1-z | =      | 2_676 | Check     |
| PLAT432_ALERT_2_G Short Inter X...Y Contact                        | C33         | ..C72A | .     | 3.12 Ang. |
|                                                                    | 1-x,2-y,1-z | =      | 2_676 | Check     |
| PLAT432_ALERT_2_G Short Inter X...Y Contact                        | C34         | ..C72A | .     | 2.81 Ang. |
|                                                                    | 1-x,2-y,1-z | =      | 2_676 | Check     |
| PLAT432_ALERT_2_G Short Inter X...Y Contact                        | C35         | ..C72A | .     | 2.77 Ang. |
|                                                                    | 1-x,2-y,1-z | =      | 2_676 | Check     |
| PLAT432_ALERT_2_G Short Inter X...Y Contact                        | C46         | ..C48B | .     | 2.74 Ang. |
|                                                                    | x,y,z       | =      | 1_555 | Check     |
| PLAT432_ALERT_2_G Short Inter X...Y Contact                        | C55         | ..C47A | .     | 2.78 Ang. |
|                                                                    | 2-x,1-y,2-z | =      | 2_767 | Check     |
| PLAT773_ALERT_2_G Check long C-C Bond in CIF: C48B                 | --C47A      |        |       | 1.77 Ang. |
| PLAT789_ALERT_4_G Atoms with Negative _atom_site_disorder_group    | #           |        |       | 40 Check  |
| PLAT790_ALERT_4_G Centre of Gravity not Within Unit Cell: Resd.    | #           |        |       | 2 Note    |
| C2 H3                                                              |             |        |       |           |
| PLAT860_ALERT_3_G Number of Least-Squares Restraints               | .....       |        |       | 488 Note  |
| PLAT912_ALERT_4_G Missing # of FCF Reflections Above STh/L=        | 0.600       |        |       | 117 Note  |
| PLAT933_ALERT_2_G Number of HKL-OMIT Records in Embedded .res File |             |        |       | 8 Note    |
| PLAT978_ALERT_2_G Number C-C Bonds with Positive Residual Density. |             |        |       | 0 Info    |
| PLAT992_ALERT_5_G Repd & Actual _reflns_number_gt Values Differ by |             |        |       | 3 Check   |

---

0 **ALERT level A** = Most likely a serious problem - resolve or explain  
 0 **ALERT level B** = A potentially serious problem, consider carefully  
 19 **ALERT level C** = Check. Ensure it is not caused by an omission or oversight  
 40 **ALERT level G** = General information/check it is not something unexpected

6 ALERT type 1 CIF construction/syntax error, inconsistent or missing data  
 32 ALERT type 2 Indicator that the structure model may be wrong or deficient  
 6 ALERT type 3 Indicator that the structure quality may be low  
 13 ALERT type 4 Improvement, methodology, query or suggestion  
 2 ALERT type 5 Informative message, check

---

It is advisable to attempt to resolve as many as possible of the alerts in all categories. Often the minor alerts point to easily fixed oversights, errors and omissions in your CIF or refinement strategy, so attention to these fine details can be worthwhile. In order to resolve some of the more serious problems it may be necessary to carry out additional measurements or structure refinements. However, the purpose of your study may justify the reported deviations and the more serious of these should normally be commented upon in the discussion or experimental section of a paper or in the "special\_details" fields of the CIF. checkCIF was carefully designed to identify outliers and unusual parameters, but every test has its limitations and alerts that are not important in a particular case may appear. Conversely, the absence of alerts does not guarantee there are no aspects of the results needing attention. It is up to the individual to critically assess their own results and, if necessary, seek expert advice.

### **Publication of your CIF in IUCr journals**

A basic structural check has been run on your CIF. These basic checks will be run on all CIFs submitted for publication in IUCr journals (*Acta Crystallographica*, *Journal of Applied Crystallography*, *Journal of Synchrotron Radiation*); however, if you intend to submit to *Acta Crystallographica Section C* or *E* or *IUCrData*, you should make sure that full publication checks are run on the final version of your CIF prior to submission.

### **Publication of your CIF in other journals**

Please refer to the *Notes for Authors* of the relevant journal for any special instructions relating to CIF submission.

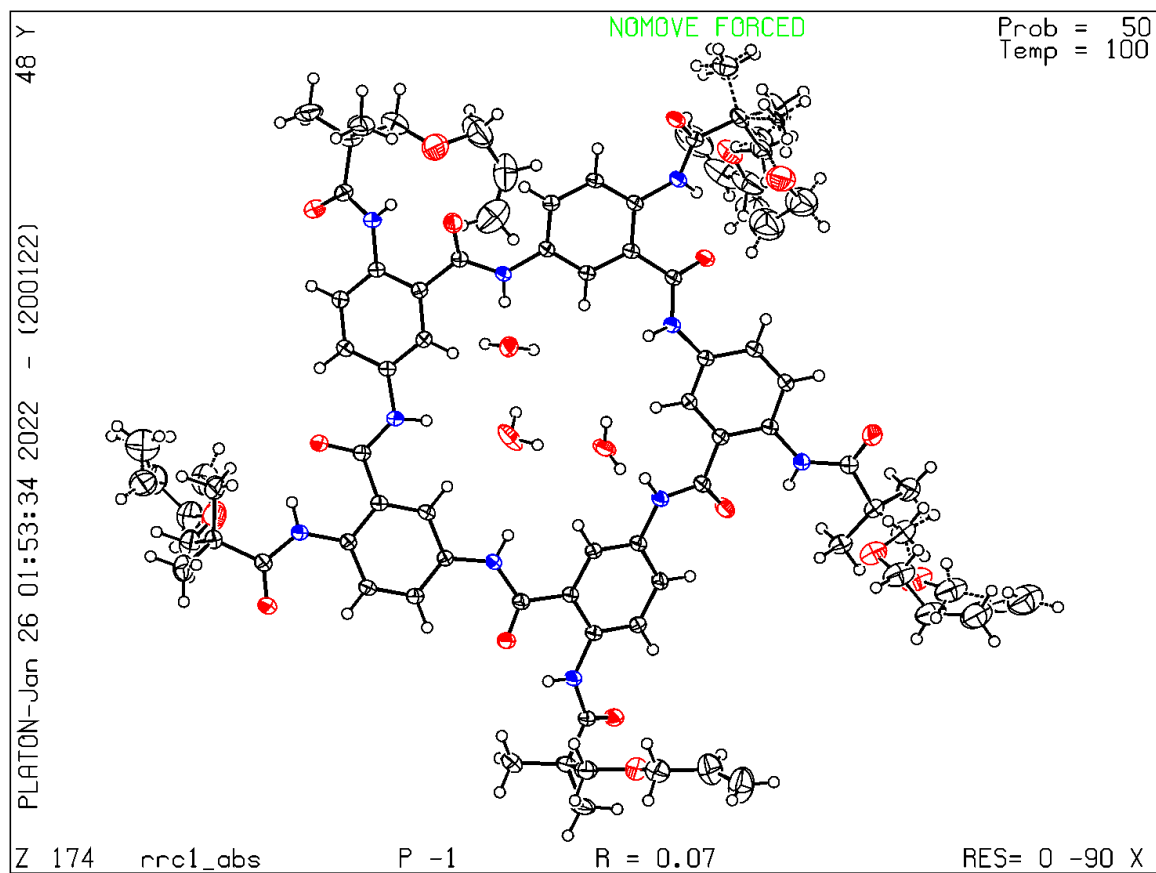

Supplement: Supplementary file 1 [file 72f39f6b1b02260532a175a9.pdf]
